# Supplementary material
Source: publisher site journal article supplement (https://www.dovepress.com/article/423167)
Supplement: Supplementary file 1 [file get_supplementary_file.php]

**Supplemental materials**

**Supplemental Table 1.** Distribution of samples collected in this study

**Supplemental Table 2.** Top 10 bacterial isolates from the samples collected pre- and post-pandemic periods

**Supplemental Table 3.** Distribution of *P. aeruginosa* isolates from the samples collected in this study

**Supplemental Table 1.** Distribution of samples collected in this study

| Sources | Pre-pandemic  (*n*, %) (Total samples=5386) | Post-pandemic  (*n*, %) (Total samples=3622) |
| --- | --- | --- |
| Sputum/bronchial secretion | 4135 (76.79) | 2561 (76.81) |
| Blood | 736 (15.83) | 423 (11.68)** |
| Urine | 201 (3.88) | 244 (6.74)*** |
| Pleural effusion | 183 (3.4) | 131 (3.62) |
| Peritoneal effusion | 5 (0.09) | 7 (0.19) |
| Secretion# | 16 (0.30) | 10 (0.28) |
| Others | 109 (2.02) | 25 (0.69)*** |

Note:  *P*<0.01, ***：*P*<0.001*.* #: Do not contain bronchial secretion, the same below.

**Supplemental Table 2.** Top 10 bacterial isolates from the samples collected pre- and post-pandemic periods

| Pathogens | Pre-pandemic (*n*, %)  (Total bacterial isolates = 913) | Post-pandemic (*n*, %)  (Total bacterial isolates =829) |
| --- | --- | --- |
| *Klebsiella pneumoniae* | 216 (23.66%) | 178 (21.47%) |
| *Acinetobacter baumannii* | 162 (17.74%) | 93 (11.22%)*** |
| *Pseudomonas aeruginosa* | 131 (14.35%) | 185 (22.31%)*** |
| *Escherichia coli* | 53 (5.81%) | 91 (10.98%)*** |
| *Serratia marcescens* | 39 (4.27%) | 18 (2.17%)* |
| *Enterobacter cloacae* | 36 (3.94%) | 32 (3.86%) |
| *Enterococcus faecium* | 32 (0.59%) | 25 (3.02%) |
| *Stenotrophomonas maltophilia* | 31 (3.50%) | 19 (2.29%) |
| *Staphylococcus aureus* | 27 (2.96%) | 20 (2.41%) |
| *Haemophilus influenzae* | 23 (2.52%) | 5 (0.60%)** |

Note：*：*P*<0.05, **：*P*<0.01, ***：*P*<0.001*.*

**Supplemental Table 3.** Distribution of *P. aeruginosa* isolates from the samples collected in this study

| Sources | *P. aeruginosa* isolates | | Drug resistant *P. aeruginosa* isolates | |
| --- | --- | --- | --- | --- |
| Pre-pandemic (*n*, %)  (total *n* = 131) | Post-pandemic (*n*, %)  (total *n* = 185) | Pre-pandemic (*n*, %)  (total *n* = 39) | Post-pandemic (*n*, %)  (total *n* = 36) |
| Sputum/bronchial secretion | 128 (97.71%) | 181 (97.84%) | 38 (97.44%) | 35 (97.22%) |
| Blood | 0 (0.00%) | 1 (0.03 %) | 0 (0.00%) | 1 (2.78 %) |
| Urine | 0 (0.00%) | 3 (1.62%) | 0 (0.00%) | 0 (0.00%) |
| Pleural effusion | 1 (0.76) | 0 (0.00%) | 0 (0.00%) | 0 (0.00%) |
| Peritoneal effusion | 0 (0.00) | 0 (0.00%) | 0 (0.00%) | 0 (0.00%) |
| Secretion# | 1 (0.76) | 0 (0.00%) | 1 (0. %) | 0 (0.00%) |
| Others | 1 (0.76) | 0 (0.69%) | 0 (0.00%) | 0 (0.00%) |

#: Do not contain bronchial secretion
